# Supplementary material for: Elevated olivine weathering rates and sulfate formation at cryogenic temperatures on Mars
Source: PubMed Central journal article supplement (PMC5647339; doi:10.1038/s41467-017-01227-7), 2017-10-17
Supplement: 41467_2017_1227_MOESM1_ESM.pdf [file 41467_2017_1227_MOESM1_ESM.pdf]

**Supplementary Table 1. San Carlos Olivine -40 C**

| Exp # | Exp duration (d) | Exp duration (s) | Sample Mass (mg) | Surf Area (cm <sup>2</sup> /g) | Soln conc (Mg ppm) | Soln conc (Fe ppm) |
|-------|------------------|------------------|------------------|--------------------------------|--------------------|--------------------|
| 1     | 9.13             | 788400           | 50.5             | 0.481                          | 16.21              | 3.318              |
| 2     | 7.13             | 615600           | 50.6             | 0.481                          | 14.87              | 3.078              |
| 3     | 5.13             | 442800           | 49.8             | 0.481                          | 11.09              | 2.231              |
| 4     | 3.21             | 277200           | 50.6             | 0.481                          | 9.82               | 1.927              |
| 5     | 2.13             | 183600           | 50.4             | 0.481                          | 7.90               | 1.47               |
| 6     | 1.13             | 97200            | 50.4             | 0.481                          | 5.48               | 0.902              |
| 7     | 0.88             | 75600            | 49.5             | 0.481                          | 5.02               | 0.85               |
| 8     | 0.13             | 10800            | 50.4             | 0.481                          | 4.17               | 0.593              |
| 9     | 0.04             | 3600             | 50.4             | 0.481                          | 4.20               | 0.623              |
| 10    | Blank            | 0                | 0                | 0                              | 1.55               | 0.257              |

**Supplementary Table 2. San Carlos Olivine -60 C**

| Exp # | Exp duration (d) | Exp duration (s) | Sample Mass (mg) | Surf Area (cm <sup>2</sup> /g) | Soln conc (Mg ppm) | Soln conc (Fe ppm) |
|-------|------------------|------------------|------------------|--------------------------------|--------------------|--------------------|
| 1     | 14.00            | 1209960          | 50.00            | 0.481                          | 6.95               | 1.343              |
| 2     | 9.01             | 778200           | 51.20            | 0.481                          | 6.63               | 1.238              |
| 3     | 7.01             | 605700           | 50.10            | 0.481                          | 7.25               | 1.737              |
| 4     | 4.85             | 418620           | 50.50            | 0.481                          | 5.85               | 1.104              |
| 5     | 2.02             | 174120           | 50.40            | 0.481                          | 6.07               | 1.139              |
| 6     | 1.05             | 90720            | 50.20            | 0.481                          | 5.85               | 1.067              |
| 7     | 0.68             | 58740            | 49.50            | 0.481                          | 6.15               | 1.159              |

**Supplementary Table 3.**  
**San Carlos Olivine, No acid -40° C**

| Exp day   | Exp duration (d) | Sample Mass (mg) | Surf Area (cm <sup>2</sup> ) | Soln conc (Mg ppm) | Soln conc (Fe ppm) |
|-----------|------------------|------------------|------------------------------|--------------------|--------------------|
| 1/12/2012 | 14.00            | 50.40            | 0.481                        | 1.17               | NA                 |
| 1/15/2012 | 11.01            | 51.00            | 0.481                        | 1.10               | NA                 |
| 1/17/2012 | 9.01             | 49.40            | 0.481                        | 1.07               | NA                 |
| 1/19/2012 | 7.01             | 49.80            | 0.481                        | 1.12               | NA                 |
| 1/21/2012 | 4.80             | 49.40            | 0.481                        | 0.96               | NA                 |
| 1/23/2012 | 3.01             | 50.20            | 0.481                        | 0.92               | NA                 |
| 1/24/2012 | 2.02             | 50.90            | 0.481                        | 1.04               | NA                 |
| 1/25/2012 | 1.05             | 49.50            | 0.481                        | 0.88               | NA                 |
| 1/25/2012 | 0.68             | 49.20            | 0.481                        | 0.89               | NA                 |
| 1/26/2012 | 0.02             | 49.60            | 0.481                        | 0.73               | NA                 |

**Supplementary Table 4.**  
**No Olivine, acid + spheres, -40° C**

| Exp day   | Exp duration (d) | Sample Mass (mg) | Surf Area (cm <sup>2</sup> ) | Soln conc (Mg ppm) | Soln conc (Fe ppm) |
|-----------|------------------|------------------|------------------------------|--------------------|--------------------|
| 7/23/2015 | 0                | 0                | 0                            | 1.64               | 0.21               |
| 7/9/2015  | 1                | 0                | 0                            | 1.40               | 0.26               |
| 7/9/2015  | 1                | 0                | 0                            | 1.07               | 0.21               |
| 7/28/2015 | 7                | 0                | 0                            | 2.46               | 0.19               |
| 7/28/2015 | 7                | 0                | 0                            | 2.63               | 0.27               |

### Dissolution Rate -40° C

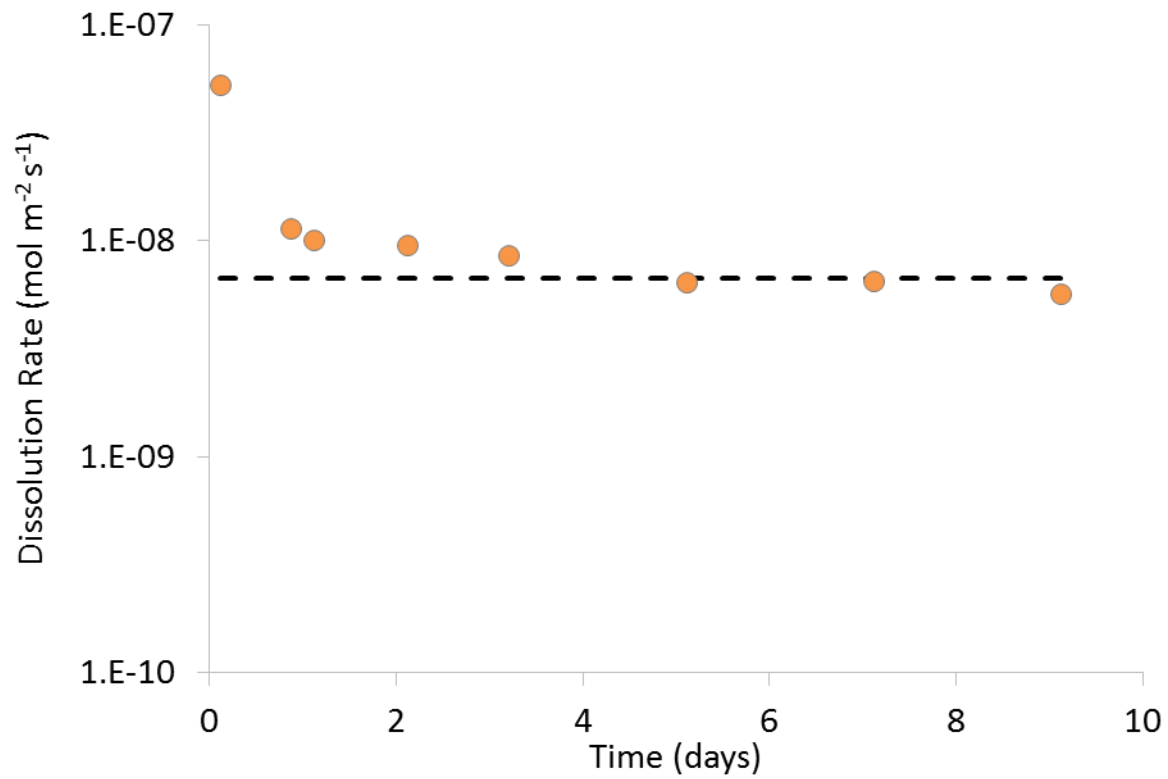

Supplementary Figure 1. Calculated dissolution rate of olivine over time. The black dotted line indicates the rate calculated from experiments with durations (>3 days). Uncertainties were calculated using standard deviation of the average.

## Dissolution Rate -60° C

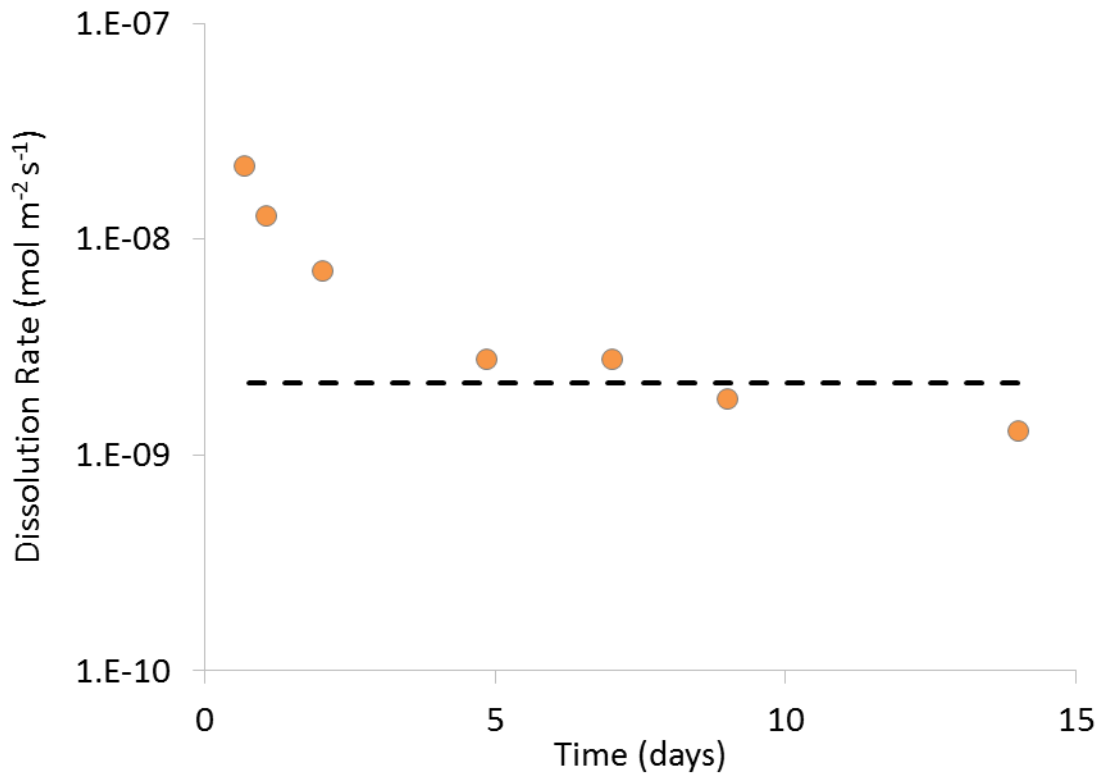

Supplementary Figure 2. Calculated dissolution rate of olivine over time. The black dotted line indicates the rate calculated from experiments with durations (>3 days). Uncertainties were calculated using standard deviation of the average.

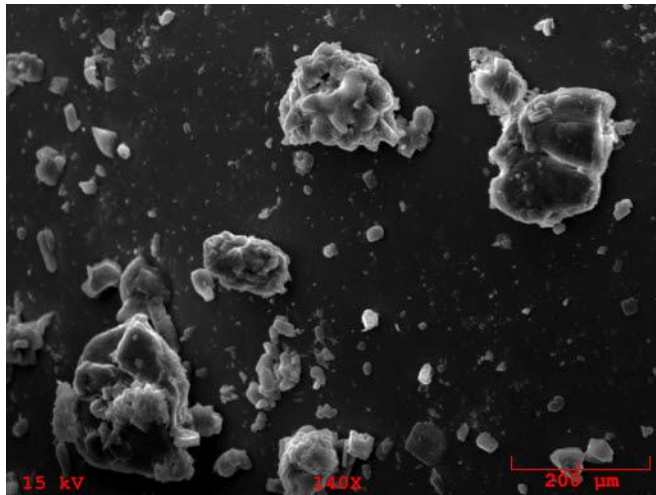

Supplementary Figure 3. SEM image of run products after 11 days at -60 C.

| Spectrum         | C     | O      | Na    | Mg     | Si     | S      | Ca     | Fe    |
|------------------|-------|--------|-------|--------|--------|--------|--------|-------|
| Image10_CGII-D-1 | 8.888 | 31.816 | 3.982 | 3.3    | 46.356 | 4.609  | 1.049  |       |
| Image10_CGII-D-2 | 7.092 | 31.051 |       | 19.273 | 10.849 | 27.701 |        | 4.033 |
| Image10_CGII-D-3 |       | 34.847 |       | 21.572 | 2.918  | 36.784 |        | 3.88  |
| Image10_CGII-D-4 | 2.367 | 27.707 |       | 19.959 | 5.111  | 39.216 |        | 4.9   |
| Image10_CGII-D-5 | 0     | 30.154 | 5.566 | 17.779 | 4.874  | 39.317 |        |       |
| Image10_CGII-D-6 |       | 23.603 |       | 26.54  | 25.887 | 16.444 |        | 6.411 |
| Image10_CGII-D-7 |       |        | 9.696 | 8.526  | 62.362 | 6.652  | 12.657 |       |
| Mean             | 4.587 | 29.863 | 6.415 | 16.707 | 22.622 | 24.389 | 6.853  | 4.806 |
| Std. Dev.        | 4.113 | 3.847  | 2.95  | 8.014  | 23.458 | 15.145 | 8.208  | 1.16  |
| Min              | 0     | 23.603 | 3.982 | 3.3    | 2.918  | 4.609  | 1.049  | 3.88  |
| Max              | 8.888 | 34.847 | 9.696 | 26.54  | 62.362 | 39.317 | 12.657 | 6.411 |

Supplementary Table 5. EDS data are qualitative based on potential sample porosity and lack of surface smoothness. The EDS data do provide a demonstration that sulfur rich material was present and widespread in the solid run products. The presence of significant Na and Ca are derived from the Si-sphere which the grains are resting on and Si can be either from olivine, weathered silicate residue, or the Si spheres. Carbon is derived from carbon coating.
